# Supplementary material
Source: publisher site journal article supplement (https://www.dovepress.com/article/443200)
Supplement: Supplementary file 1 [file get_supplementary_file.php]

**Supplementary Data 1.** Internal consistency of instruments.

| **Instrument** | **McDonald's ω** | **Cronbach's α** |
| --- | --- | --- |
| ZBI-Overload | .959 | .959 |
| ZBI-Competence | .775 | .763 |
| ZBI-Dependency | .744 | .743 |
| DASS21-Depression | .819 | .817 |
| DASS21- Anxiety | .831 | .830 |
| DASS21-Stress | .834 | .833 |
| CAE-FSP | .903 | .903 |
| CAE-NSP | .866 | .866 |
| CAE-PR | .874 | .873 |
| CAE-OEE | .872 | .867 |
| CAE-AVD | .885 | .884 |
| CAE-SSS | .923 | .923 |
| CAE- REL | .913 | .914 |
